# Supplementary material
Source: MDPI journal article supplement (https://www.mdpi.com/2624-5647/5/2/12)
Supplement: s1 [file s1]

**Table S1.** The prevalence, ratios, importance (Imp.) and descriptions of all predictors amongst the different patient subsets. (Note: Importance of '--' indicates the variable was not used the model splits.)

| Predictor      | Predictor description                                                                   | All (n=3564) |                           |                               |       |              | No HCV infection history (n=3215) |                               |       |              | HCV infection history (n=349) |                              |       |              |
|----------------|-----------------------------------------------------------------------------------------|--------------|---------------------------|-------------------------------|-------|--------------|-----------------------------------|-------------------------------|-------|--------------|-------------------------------|------------------------------|-------|--------------|
|                |                                                                                         | Total        | New HCV infection (n=487) | No new HCV infection (n=3077) | Imp.  | Ratio (0.16) | New HCV infection (n=244)         | No new HCV infection (n=2970) | Imp.  | Ratio (0.08) | New HCV infection (n=243)     | No new HCV infection (n=107) | Imp.  | Ratio (2.27) |
| F11            | Opioid related disorders                                                                | 66           | 52                        | 14                            | 12.5  | 3.71         | 15                                | 11                            | 11.8  | 1.36         | 37                            | 3                            | --    | 12.33        |
| N18.6          | End stage renal disease                                                                 | 105          | 33                        | 72                            | 5.3   | 0.46         | 24                                | 49                            | 6.2   | 0.49         | 9                             | 23                           | 1.6   | 0.39         |
| Text_substance | Patient with a history of substance use or abuse                                        | 327          | 146                       | 181                           | 2.854 | 0.81         | 44                                | 146                           | 4.492 | 0.30         | 102                           | 35                           | 0.561 | 2.91         |
| Text_piercing  | Presence of a piercing on patient                                                       | 103          | 13                        | 90                            | 0.492 | 0.14         | 6                                 | 87                            | 2.789 | 0.07         | 7                             | 3                            | 0.052 | 2.33         |
| F14            | Cocaine related disorders                                                               | 16           | 11                        | 5                             | 2.6   | 2.20         | 2                                 | 3                             | 1.975 | 0.67         | 9                             | 2                            | 0.6   | 4.50         |
| Z11.3          | Encounter for screening for infections with a predominantly sexual mode of transmission | 454          | 29                        | 425                           | 1.3   | 0.07         | 7                                 | 420                           | 1.6   | 0.02         | 22                            | 5                            | 1.1   | 4.40         |
| Meds_opioid    | Patient prescribed opioid medication                                                    | 467          | 120                       | 347                           | 2.295 | 0.35         | 42                                | 323                           | 1.455 | 0.13         | 78                            | 24                           | 0.13  | 3.25         |

[illegible]

|        |                                                    |     |     |    |       |      |    |    |    |      |     |    |       |      |
|--------|----------------------------------------------------|-----|-----|----|-------|------|----|----|----|------|-----|----|-------|------|
| A58    | Granuloma inguinale                                | 1   | 0   | 1  | --    | 0.00 | 0  | 1  | -- | 0.00 | --  | -- | --    | --   |
| A60.1  | Herpesviral infection of perianal skin and rectum  | --  | --  | -- | --    | --   | -- | -- | -- | 0.00 | --  | -- | --    | --   |
| B00    | Herpesviral infection, unspecified                 | 58  | 9   | 49 | --    | 0.18 | 3  | 48 | -- | 0.06 | 6   | 1  | --    | 6    |
| B17.1  | Acute hepatitis C without hepatic coma             | 21  | 15  | 6  | --    | 2.50 | -- | -- | -- | --   | 15  | 6  | --    | 2.50 |
| B18.1  | Chronic viral hepatitis B without delta-agent      | 4   | 1   | 3  | --    | 0.33 | -- | -- | -- | --   | 1   | 3  | --    | 0.33 |
| B18.2  | Chronic viral hepatitis C                          | 120 | 82  | 38 | 28.8  | 2.16 | -- | -- | -- | --   | 82  | 38 | 1.937 | 2.16 |
| B19.1  | Unspecified viral hepatitis B without hepatic coma | 11  | 1   | 10 | --    | 0.10 | -- | -- | -- | --   | 1   | 10 | --    | 0.1  |
| B19.2  | Unspecified viral hepatitis C without hepatic coma | 277 | 197 | 80 | 201.6 | 2.46 | -- | -- | -- | --   | 197 | 80 | 1.417 | 2.46 |
| B20    | Human immunodeficiency virus [HIV] disease         | 71  | 22  | 49 | 0.5   | 0.45 | 7  | 40 | -- | 0.18 | 15  | 9  | 0.3   | 1.67 |
| F19.2  | Other psychoactive substance dependence            | 4   | 4   | 0  | --    | 0.00 | 2  | 0  | -- | 0    | 2   | 0  | --    | 0.00 |
| K62.89 | Other specified diseases of anus and rectum        | 21  | 6   | 15 | --    | 0.40 | 1  | 15 | -- | 0.07 | 5   | 0  | --    | 0.00 |
| K70    | Alcoholic liver disease                            | 11  | 5   | 6  | --    | 0.83 | 0  | 4  | -- | 0    | 5   | 2  | --    | 2.50 |

|         |                                                                                                      |    |    |    |     |      |    |    |    |      |    |    |     |      |
|---------|------------------------------------------------------------------------------------------------------|----|----|----|-----|------|----|----|----|------|----|----|-----|------|
| K71     | Toxic liver disease                                                                                  | -- | -- | -- | --  | --   | -- | -- | -- | --   | -- | -- | --  | --   |
| K72     | Hepatic failure, not elsewhere classified                                                            | 11 | 7  | 4  | --  | 1.75 | 1  | 3  | -- | 0.33 | 6  | 1  | --  | 6.00 |
| K73     | Chronic hepatitis, not elsewhere classified                                                          | 4  | 2  | 2  | --  | 1.00 | -- | -- | -- | --   | 2  | 2  | --  | 1.00 |
| K75     | Other inflammatory liver diseases                                                                    | 13 | 5  | 8  | --  | 0.63 | 1  | 6  | -- | 0.17 | 4  | 2  | --  | 2.00 |
| K76     | Other diseases of liver                                                                              | 93 | 15 | 78 | 2.8 | 0.19 | 0  | 64 | -- | 0.00 | 15 | 14 | 3.5 | 1.07 |
| K77     | Liver disorders in diseases classified elsewhere                                                     | -- | -- | -- | --  | --   | -- | -- | -- | --   | -- | -- | --  | --   |
| R74.01  | Elevation of levels of liver transaminase levels                                                     | 7  | 7  | 0  | --  | 0.00 | 2  | 0  | -- | 0.00 | 5  | 0  | --  | 0.00 |
| W46.0   | Contact with hypodermic needle                                                                       | 1  | 0  | 1  | --  | 0.00 | 0  | 1  | -- | 0.00 | -- | -- | --  | --   |
| Z01.812 | Encounter for preprocedural laboratory examination                                                   | 32 | 10 | 22 | --  | 0.45 | 6  | 14 | -- | 0.43 | 4  | 8  | --  | 0.50 |
| Z11.4   | Encounter for screening for human immunodeficiency virus [HIV]                                       | 19 | 2  | 17 | --  | 0.12 | 1  | 17 | -- | 0.06 | 1  | 0  | --  | 0.00 |
| Z20.2   | Contact with and (suspected) exposure to infections with a predominantly sexual mode of transmission | 86 | 6  | 80 | --  | 0.08 | 2  | 80 | -- | 0.03 | 4  | 0  | --  | 0.00 |

|                    |                                                                                  |     |     |     |       |      |    |     |    |      |    |    |       |      |
|--------------------|----------------------------------------------------------------------------------|-----|-----|-----|-------|------|----|-----|----|------|----|----|-------|------|
| Z20.5              | Contact with and (suspected) exposure to viral hepatitis                         | 19  | 1   | 18  | --    | 0.06 | 0  | 8   | -- | 0.00 | 1  | 10 | 1.1   | 0.10 |
| Z20.6              | Contact with and (suspected) exposure to human immunodeficiency virus [HIV]      | 5   | 0   | 5   | --    | 0.00 | 0  | 5   | -- | 0.00 | 0  | 0  | --    | 0.00 |
| Z65.1              | Imprisonment and other incarceration                                             | --  | --  | --  | --    | --   | -- | --  | -- | --   | -- | -- | --    | --   |
| Z71.5              | Drug abuse counseling and surveillance                                           | --  | --  | --  | --    | --   | -- | --  | -- | --   | -- | -- | --    | --   |
| Z72.5              | High risk sexual behavior                                                        | 58  | 5   | 53  | --    | 0.09 | 3  | 53  | -- | 0.06 | 2  | 0  | --    | 0.00 |
| Z77.21             | Contact with and (suspected) exposure to potentially hazardous body fluids       | 1   | 0   | 1   | --    | 0.00 | 0  | 1   | -- | 0.00 | 0  | 0  | --    | 0    |
| Z86.59             | Personal history of other mental and behavioral disorders                        | 26  | 5   | 21  | --    | 0.24 | 2  | 20  | -- | 0.10 | 3  | 1  | --    | 3    |
| Text_incarceration | Patient has been incarcerated                                                    | 107 | 39  | 68  | 1.072 | 0.57 | 5  | 54  | -- | 0.09 | 34 | 14 | --    | 2.43 |
| Text_tattoo        | Presence of a tattoo on patient                                                  | 92  | 14  | 78  | 0.836 | 0.18 | 5  | 74  | -- | 0.07 | 9  | 4  | 0.863 | 2.25 |
| Text_transfusion   | Patient with a history of transfusions and solid organ transplants prior to 1992 | 622 | 132 | 490 | 1.015 | 0.27 | 39 | 433 | -- | 0.09 | 93 | 57 | 2.26  | 1.63 |
| Text_needlestick   | Patient with history of needlestick injury                                       | 11  | 2   | 9   | --    | 0.22 | 1  | 9   | -- | 0.11 | 1  | 0  | --    | 0    |
